# Supplementary material
Source: Elsevier journal article supplement (https://www.sciencedirect.com/science/article/pii/S260364792200029X)
Supplement: mmc1 [file S260364792200029X:mmc1.doc]

**APÉNDICES**

**Apéndice 1: Glosario de términos**

**A. Definiciones según el glosario de términos de CISEMadrid:**

**Incidente de seguridad:** Es aquel que bien por casualidad o bien por una intervención determinada a tiempo, no ha producido daños ni pérdidas al paciente, pero que en otras circunstancias podría haberlo producido *(Norma UNE. Servicios Sanitarios. Gestión de Riesgos para la Seguridad del Paciente. 179003) 11*

**Error de Medicación (1):** Cualquier incidente prevenible que puede causar daño al paciente o dar lugar a una utilización inapropiada de los medicamentos, cuando estos están bajo el control de los profesionales sanitarios o del paciente o consumidor. Estos incidentes pueden estar relacionados con las prácticas de los profesionales, con los productos, con los procedimientos o con los sistemas, e incluyen los fallos en la prescripción, comunicación, etiquetado, envasado, denominación, preparación, dispensación, distribución, administración, educación, seguimiento y utilización de los medicamentos *(según el National Coordinating Council for Medication Error Reporting Prevention) 12.*

**Error de Medicación (2):** Fallo por acción u omisión en el proceso de tratamiento con medicamentos que ocasionan o pueden ocasionar un daño en el paciente Los errores de medicación que ocasionan un daño en el paciente serán considerados, a efectos de su notificación como reacciones adversas, excepto aquellos derivados del fallo terapéutico por omisión de un tratamiento *(definición según RD 1344/2007) 13*.

**B. Tipo de incidentes de seguridad**

Los incidentes pueden aparecer en cualquier momento de la atención. Cada apartado incluye errores o problemas relacionados con los aspectos que describen. Debe señalarse una única categoría, que será la más relacionada con el incidente a juicio del notificador.

1. Gestión organizativa/ citaciones: Obtención de cuidados o tratamiento. Incluye citación, gestión administrativa de ingresos/altas, derivación entre consultas, traslados entre centros, tiempos de espera, dotación y organización de recursos humanos, normalización de procesos (protocolos, procedimientos, guías clínicas, etc.).

2. Infraestructuras: Estado y situación del edificio físico y sus espacios, las instalaciones (climatización, gases medicinales y oxígeno, domótica, etc.) y del mobiliario fijo para adecuar la asistencia a las necesidades de los pacientes.

3. Dispositivos médicos/ equipamiento/ mobiliario clínico: Disponibilidad, funcionamiento, uso, mantenimiento de equipos, productos sanitarios o mobiliario clínico. También incluye la falta de equipos, fallos en los equipos o en el mantenimiento o si el personal no sabe cómo se usa el equipo.

4. Identificación del paciente: Registro y/o comprobación de datos de identificación del paciente.

5. Actividades preventivas: Actividades para prevenir la aparición de enfermedades incluidas en cartera de servicios, excluida la profilaxis antibiótica en cirugía y las propias de las infecciones ligadas a la atención.

6. Valoración clínica/diagnóstico: Incluye ausencia, retrasos o errores en el proceso de valoración clínica (anamnesis y exploración física), siempre que no estén relacionados básicamente con un proceso quirúrgico o una prueba diagnóstica concreta.

7. Documentación clínica/ información/ consentimiento informado: Disponibilidad, legibilidad, adecuación de historia clínica, informes, resultados de pruebas y otros documentos o registros. También se incluye la pérdida de historia / informe /documentación / resultados de pruebas si son ilegibles o incorrectos. Transmisión de la información oral o escrita entre profesionales y entre el personal sanitario y el paciente. Confidencialidad y participación del paciente en toma de decisiones.

8. Pruebas diagnósticas: Solicitud, obtención y recogida de muestras e imágenes, realización y resultados. Incluye exploraciones inadecuadas, incompletas, mal etiquetadas y retrasos o pérdidas de los informes.

9. Infección relacionada con la atención sanitaria: Prevención y/o tratamiento de la infección (profilaxis antibiótica, herida quirúrgica, urinaria, etc.), esterilización de los equipos, limpieza de superficies, etc.

10. Medicación / vacunas: Almacenamiento, prescripción, trascripción y administración. Como ejemplos incluye el paciente que ha recibido una medicación errónea, dosis o vía incorrecta, la de otro paciente, falta de instrucciones o son incorrectas, o reacciones alérgicas e intolerancia a medicamentos u otro tipo de problema relacionado con la medicación que el paciente está tomando. Incluye vacunaciones según calendario vacunal.

11. Sangre y hemoderivados: Pruebas pretransfusionales, prescripción, preparación, transporte, dispensación, administración, almacenamiento, etc.

12. Procedimientos quirúrgicos: Indicación, realización y seguimiento de actividades asistenciales relacionadas con la cirugía, la anestesia y la reanimación postquirúrgica no incluidas en otros apartados.

13. Procedimientos terapéuticos: Indicación, prescripción, realización y seguimiento de tratamientos no farmacológicos ni quirúrgicos (cateterización vascular, respiración asistida, maniobras de resucitación pulmonar, etc.).

14. Accidentes del paciente: Pinchazo, exposición a sustancias peligrosas, resbalón, caída, quemaduras, etc.

15. Continuidad asistencial: Seguimiento clínico del paciente, sistema de coordinación entre profesionales, servicios, unidades y/o niveles asistenciales.

16. Cuidados y seguimiento del paciente: Monitorización o vigilancia del paciente incluyendo constantes vitales, higiene, signos de alarma (incluye úlceras por presión), sujeción o contención, cuidados de vías o sondas, traslados intrahospitalarios y transferencias de pacientes

17. Otros: Incluye otros aspectos de la atención sanitaria no incluidos en los apartados anteriores (condiciones medioambientales, seguridad civil y contraincendios, etc.).
